# Supplementary material for: Highly stable and active PtNiFe dandelion-like alloys for methanol electrooxidation
Source: Royal Society of Chemistry journal article supplement (doi:10.1039/c3ta12894f), 2013-01-01
Supplement: c3ta12894f.pdf [file c3ta12894f.pdf]

Electronic supplementary Information for

**Highly Stable and Active PtNiFe Dandelion-Like Alloys for  
Methanol Electrooxidation**

Zhenguo Guo, Xiaoping Dai, Ying Yang, Zhicheng Zhang, Xin Zhang,\* Shiqi Mi, Kai Xu and  
Yongfeng Li

State Key Laboratory of Heavy Oil Processing, Department of Chemical Engineering, China  
University of Petroleum, Changping, Beijing 102249, P. R. China.

*\*E-mail: Zhangxin@cup.edu.cn*

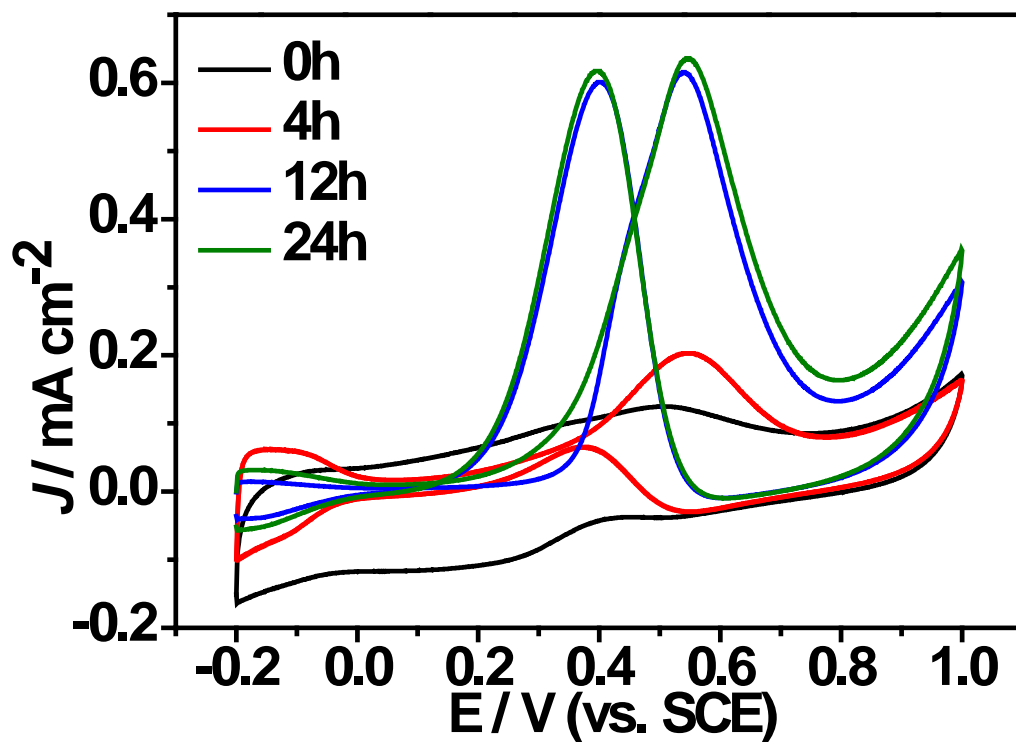

Figure S1. Effect of the UV-ozone treatment on the specific activity of PtNiFe-20 for methanol electrooxidation in solution of 0.1 M  $\text{CH}_3\text{OH}$ +0.1 M  $\text{H}_2\text{SO}_4$  at  $50 \text{ mV s}^{-1}$ .

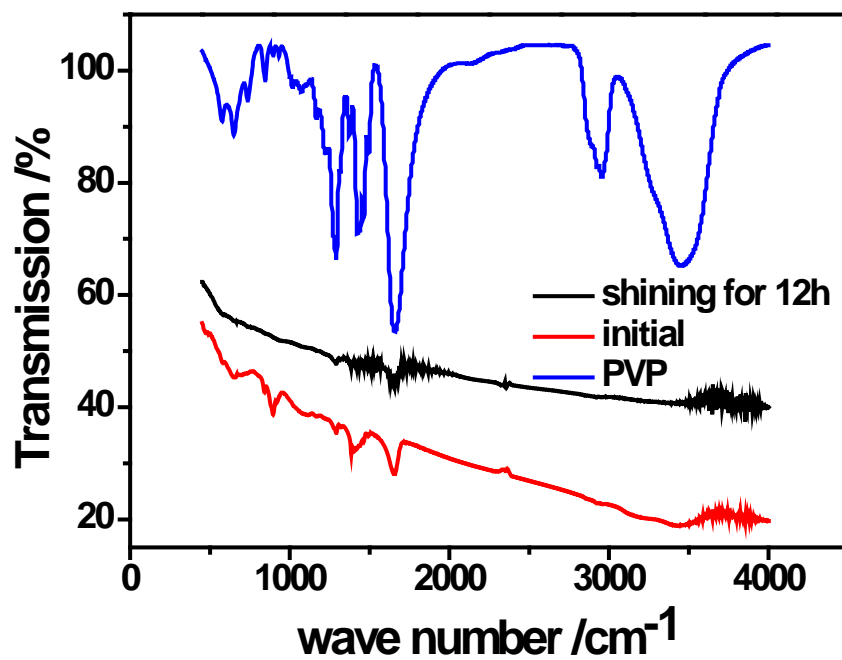

Figure S2. FT-IR spectra of PVP (blue), as synthesized PtNiFe-20 (red), and PtNiFe-20 after shining under UV-ozone for 12 h (black).

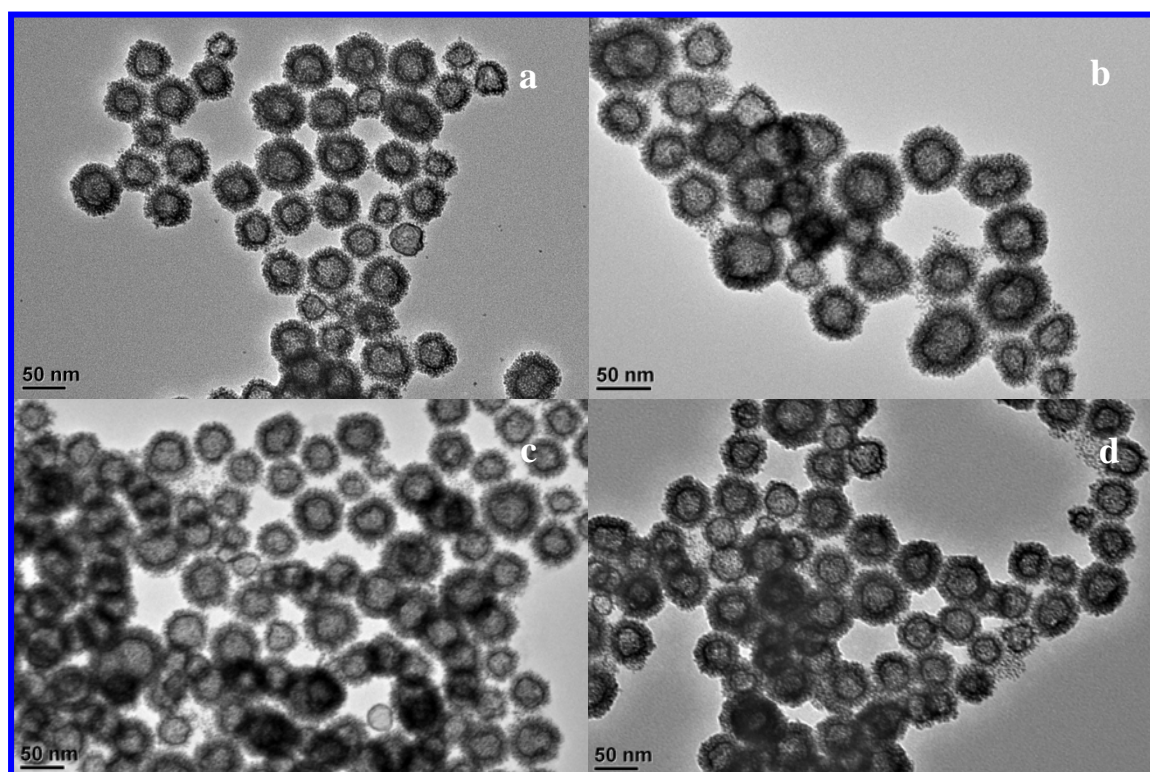

Figure S3. Effect of UV-ozone treatment on the TEM images of PtNiFe-20 catalyst (a) UV-ozone shining for 0 h, (b) shining for 4 h, (c) shining for 12 h, and (d) shining for 24 h.

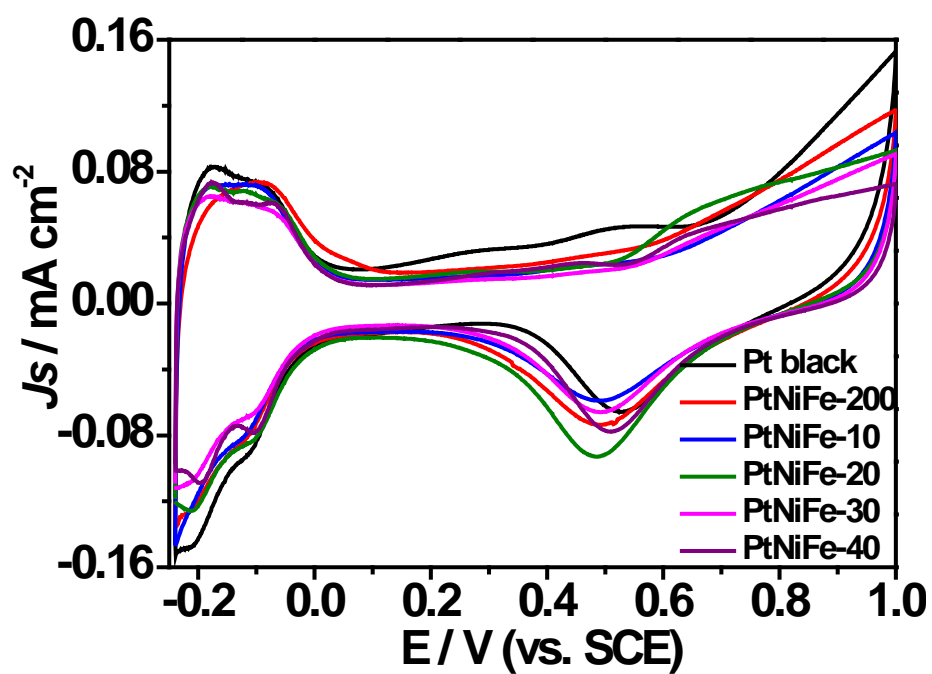

Figure S4. CV curves measured in 0.1 M  $\text{H}_2\text{SO}_4$  solution with a rate of  $50 \text{ mV s}^{-1}$  on PtNiFe-10, -20, -30, -40, -200 and Pt black catalysts.

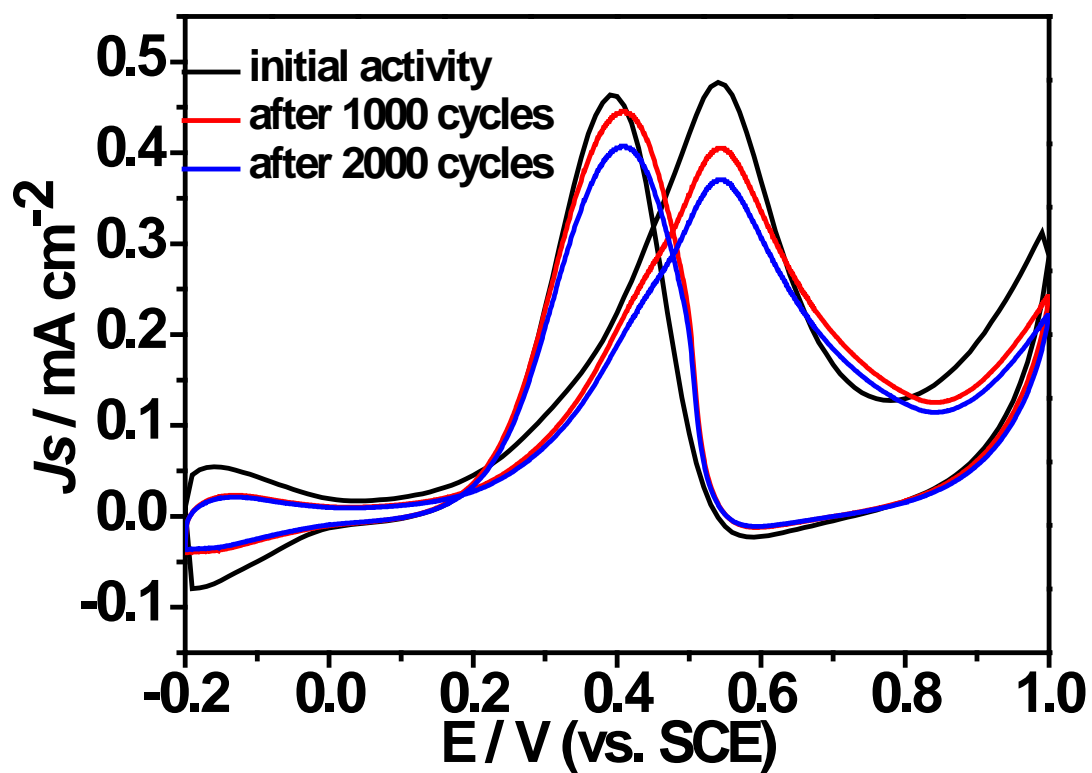

Figure S5. The variation of CV curves of commercial Pt black during the successive 1000, 2,000 cycles [CV curves were measured in solution of 0.1 M  $\text{CH}_3\text{OH}$ +0.1 M  $\text{H}_2\text{SO}_4$  at  $50 \text{ mV s}^{-1}$ ].

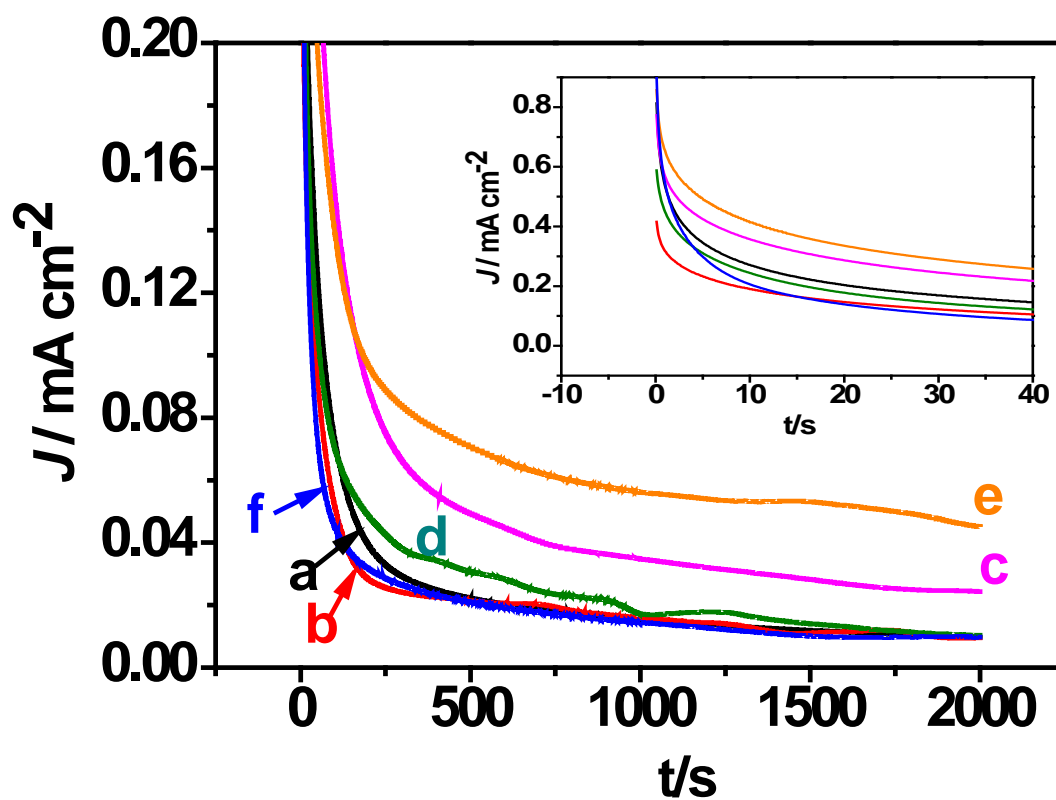

Figure S6. The variation of I-t curves of PtNiFe-20 during the successive 1000, 2000, 3000, 4500, 5500, and 7000 cycles: (a) initial activity for PtNiFe-20; (b) commercial Pt black; (c-g) after 1000 cycles, 3000 cycles, 4500 cycles and 7000 cycles for PtNiFe-20. The insert in (D) is the enlarged I-t curves within 40 s.

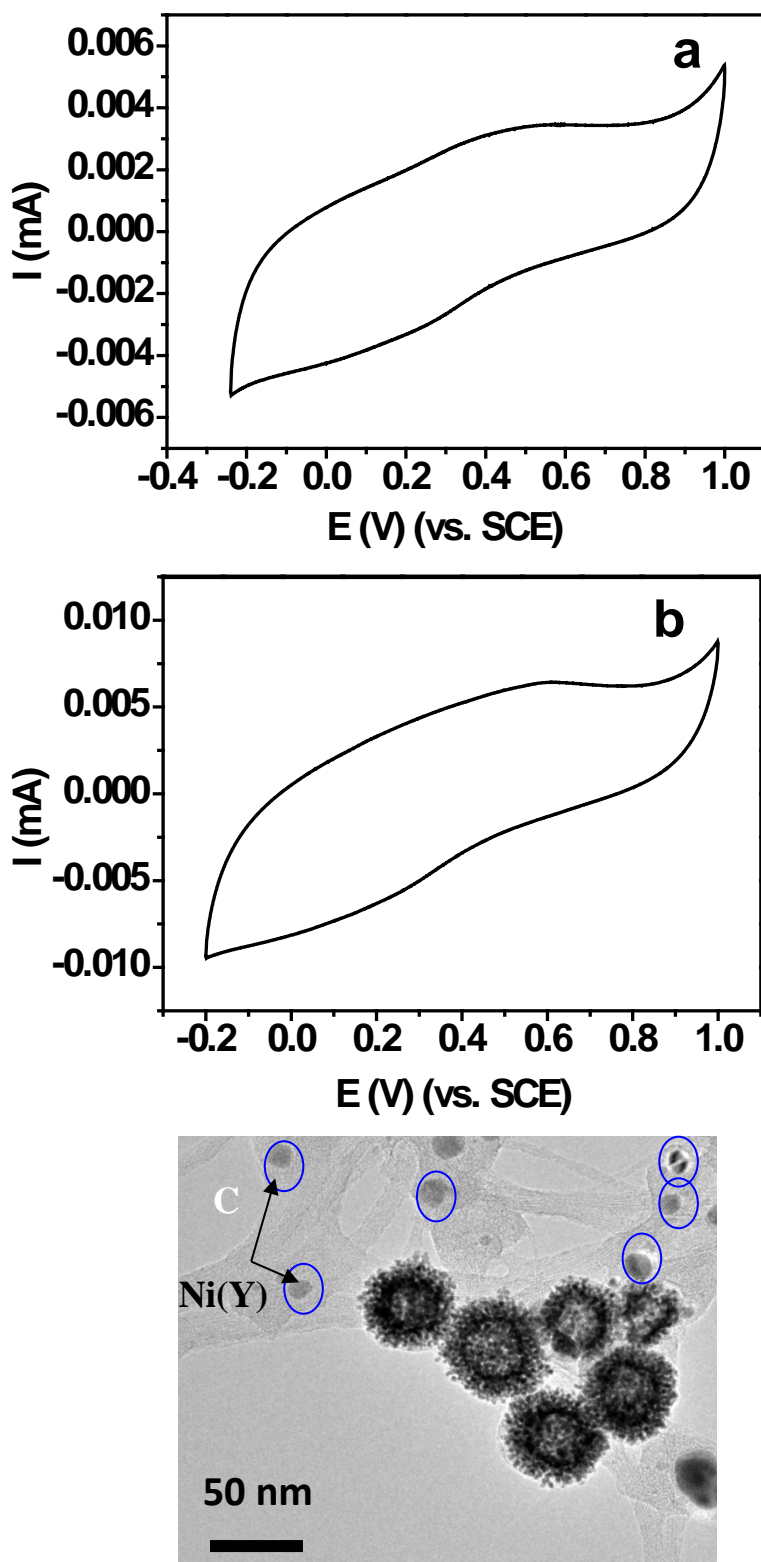

Figure S7. CV curves of SWNTs (a) measured in 0.1 M  $H_2SO_4$  solution with a rate of  $50 \text{ mV s}^{-1}$ , (b) measured in 0.1 M  $CH_3OH + 0.1 M H_2SO_4$  solution with a rate of  $50 \text{ mV s}^{-1}$ . (c) TEM images of PtNiFe-20/SWNTs, the encircled particles are Ni and Y particles. From the curves of a and b, we can see that there are no hydrogen adsorption/desorption peaks and methanol electrooxidation peaks, which illuminates



that the SWNTs containing Ni and Y metals show no catalytic activity for the methanol electrooxidation.

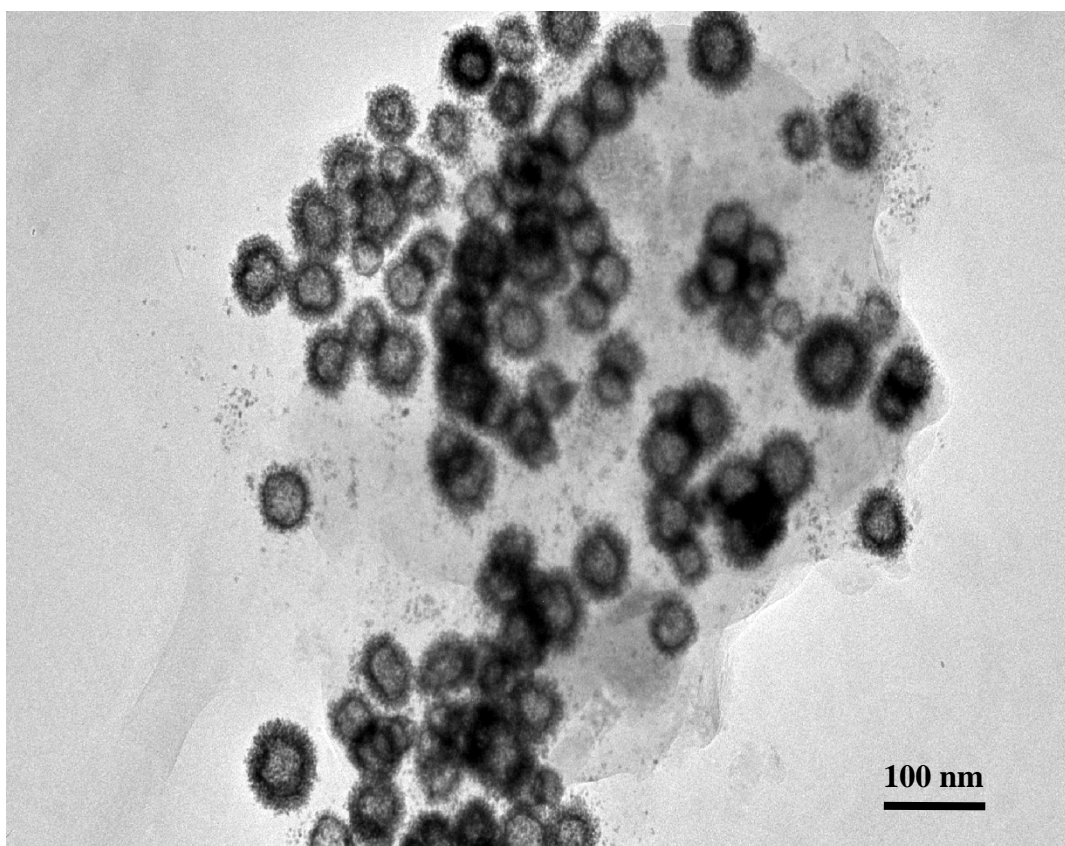

Figure S8. TEM images of PtNiFe-20 after total 7000 cycles in MOR. Note that Nafion can be observed.

**Table S1. ICP-AES analysis for the as-synthesized PtNiFe alloys**

| PtNiFe alloys | Fe         |            | Ni         |            | Pt         |            |
|---------------|------------|------------|------------|------------|------------|------------|
|               | mole ratio | mass ratio | mole ratio | mass ratio | mole ratio | mass ratio |
| PtNiFe-10     | 0.232      | 0.082      | 0.032      | 0.012      | 0.736      | 0.906      |
| PtNiFe-20     | 0.086      | 0.027      | 0.0343     | 0.011      | 0.881      | 0.962      |
| PtNiFe-30     | 0.088      | 0.028      | 0.031      | 0.010      | 0.881      | 0.962      |
| PtNiFe-40     | 0.048      | 0.014      | 0.03       | 0.010      | 0.922      | 0.976      |
| PtNiFe-200    | 0.01       | 0.003      | 0.19       | 0.067      | 0.8        | 0.930      |

**Table S2. The specific activity and mass activity for the as-synthesized PtNiFe alloys and commercial Pt black towards methonal electrooxidation.**

| Samples    | Specific activity (mA cm <sup>-2</sup> ) | The times of specific activity to Pt black | mass activity (mA mg <sub>Pt</sub> <sup>-1</sup> ) | The times of mass activity to Pt black |
|------------|------------------------------------------|--------------------------------------------|----------------------------------------------------|----------------------------------------|
| PtNiFe-10  | 0.34                                     | 1.55                                       | 36.2                                               | 2.74                                   |
| PtNiFe-20  | 0.64                                     | 2.9                                        | 61.1                                               | 4.63                                   |
| PtNiFe-30  | 0.54                                     | 2.45                                       | 66.5                                               | 5.04                                   |
| PtNiFe-40  | 0.53                                     | 2.41                                       | 76.8                                               | 5.82                                   |
| PtNiFe-200 | 0.49                                     | 2.23                                       | 114.8                                              | 8.70                                   |
| Pt black   | 0.22                                     | 1.00                                       | 13.2                                               | 1.00                                   |
